# Supplementary material for: Comparison of electrochemical performance of LiNi1−xCoxO2 cathode materials synthesized from coated (1−x)Ni(OH)2@xCo(OH)2 and doped Ni1−xCox(OH)2 precursors
Source: Royal Society of Chemistry journal article supplement (doi:10.1039/c8ra10116g), 2019-01-01
Supplement: c8ra10116g1.pdf [file c8ra10116g1.pdf]

## Supplementary Information for

### **Comparison of electrochemical performance of $\text{LiNi}_{1-x}\text{Co}_x\text{O}_2$ cathode materials synthesized from coated $(1-x)\text{Ni}(\text{OH})_2@x\text{Co}(\text{OH})_2$ and doped $\text{Ni}_{1-x}\text{Co}_x(\text{OH})_2$ precursors**

Lei Tang<sup>a</sup>, Gang Li<sup>b</sup>, Peng Xiao<sup>a</sup>, Xu Chen<sup>a</sup>, Wensheng Yang<sup>\*a</sup>

<sup>a</sup> State Key Laboratory of Chemical Resource Engineering, Beijing University of Chemical Technology, Beijing 100029, China; Email: [yangws@mail.buct.edu.cn](mailto:yangws@mail.buct.edu.cn)

<sup>b</sup> Research Institute of Petroleum Processing, Sinopec, Beijing 100083, China

## Rate performance test

The Li/LiNi<sub>1-x</sub>Co<sub>x</sub>O<sub>2</sub> (x = 0.04, 0.08, 0.12, 0.16) cells were charged and discharged by applying a constant current density of 20 mA g<sup>-1</sup> (0.1C) for the initial 5 cycles and then cycled at 0.2C, 0.5C, 1C, 2C, 5C, 0.1C for the subsequent 30 cycles in the voltage range of 2.75-4.3 V at room temperature on a LAND CT-2001A test system (Wuhan).

Fig. S1 shows rate performance of the LiNi<sub>1-x</sub>Co<sub>x</sub>O<sub>2</sub> materials synthesized from coated and doped precursors. For the initial 5 cycles at the current density of 0.1C, the LiNi<sub>1-x</sub>Co<sub>x</sub>O<sub>2</sub> materials synthesized from coated and doped precursors both have the highest discharge specific capacity at Co content x = 0.08. However, the material with the highest discharge specific capacity becomes LiNi<sub>0.88</sub>Co<sub>0.12</sub>O<sub>2</sub> as the current density increases to 0.2C and is maintained until the 35th cycle at different current densities. We calculated the capacity retention rates of the LiNi<sub>0.88</sub>Co<sub>0.12</sub>O<sub>2</sub> materials synthesized from coated and doped precursors at current density from 0.1C to 5C, which are 78% and 73%, respectively. This is consistent with our conclusion that the electrochemical property of the LiNi<sub>0.88</sub>Co<sub>0.12</sub>O<sub>2</sub> material from the coated precursor is the best. It can be attributed to the “barrier effect” of the coated Co(OH)<sub>2</sub> layer.

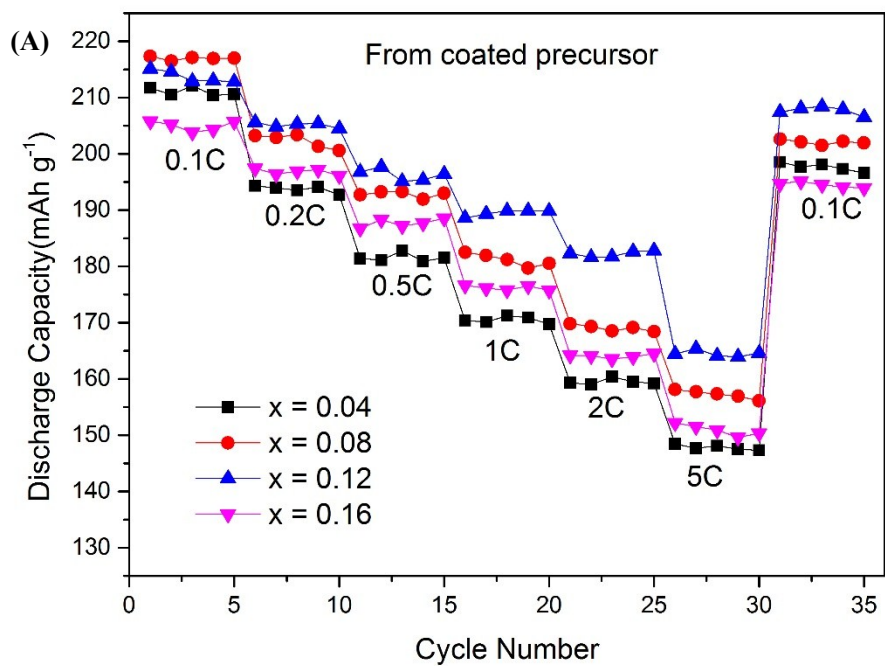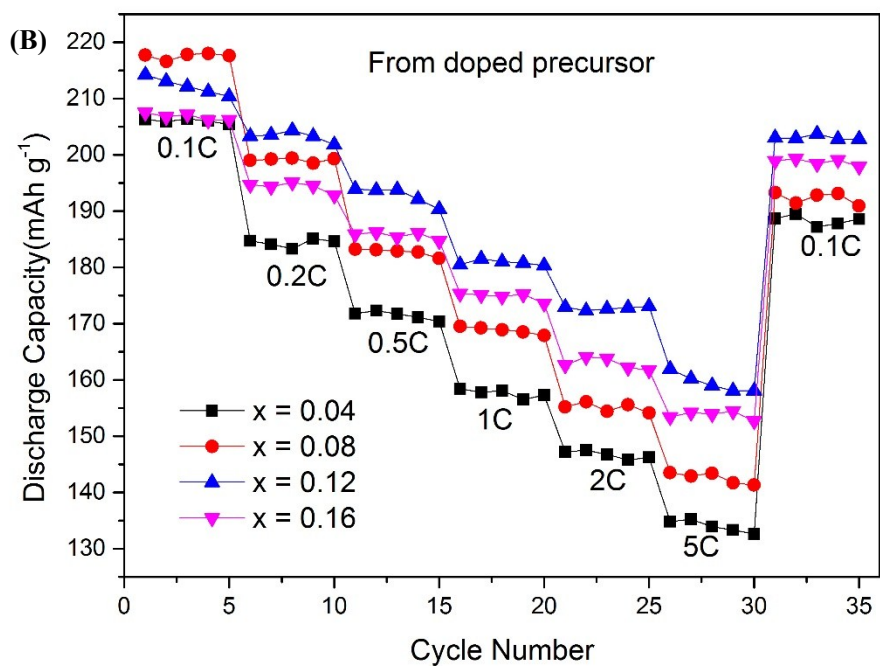

Fig. S1 Rate performances of the  $\text{LiNi}_{1-x}\text{Co}_x\text{O}_2$  ( $x = 0.04, 0.08, 0.12, 0.16$ ) materials synthesized from (A) coated and (B) doped precursors.
